# Supplementary material for: A paralog of Pcc1 is the fifth core subunit of the KEOPS tRNA-modifying complex in Archaea
Source: PubMed Central journal article supplement (PMC9889334; doi:10.1038/s41467-023-36210-y), 2023-02-01
Supplement: 41467_2023_36210_MOESM3_ESM.pdf [file 41467_2023_36210_MOESM3_ESM.pdf]

## **Description of Additional Supplementary Files:**

**Supplementary Dataset 1:** Sequence homology search for Pcc1 and Pcc2 orthologs. The table contains raw data and the summary of the raw data from the Jackhmmr search.

**Source data:** Enzymatic activity and tRNA binding of archaeal KEOPS complexes. The file contains raw data obtained for measurements of t6 A formation and tRNA binding using purified KEOPS complexes.
